# Supplementary material for: In vivo-measured Lewy body pathology is associated with neuropsychiatric symptoms across the Alzheimer’s disease continuum
Source: Research Square preprint supplement (doi:10.21203/rs.3.rs-6270682/v1), 2025-03-26
Supplement: Supplementary file 1 [file 3aa994c810f536c56cd0f27e.docx]

SUPPLEMENTARY MATERIAL: TABLE OF CONTENTS

[Statistical models 2](#_Toc192750762)

[Diagnostic analyses 4](#_Toc192750763)

[Supplementary Table 1. Logistic regression diagnostics. 5](#_Toc192750764)

[Supplementary Table 2. Cox proportional hazards regression models diagnostics. 8](#_Toc192750765)

[Supplementary Table 3. Prevalence of neuropsychiatric symptoms according to AD and LB pathologies. 10](#_Toc192750766)

[Supplementary Table 4. Cross-sectional association between LB and neuropsychiatric symptoms according to cognitive status. 11](#_Toc192750767)

[Supplementary Table 5. Association between LB and the development of neuropsychiatric symptoms according to cognitive status. 12](#_Toc192750768)

[Supplementary Figure 1. Study flow chart 13](#_Toc192750769)

[References 14](#_Toc192750770)

# Statistical models

i. represents the intercept;

ii. is the dummy variable for LB (1 = LB-positive, 0 = LB-negative);

iii. is the dummy variable for sex (1 = male, 0 = female);

iv. represents years of age for subject *i* at baseline;

v. is the dummy variable for cognitive status (1 = cognitively impaired, 0 = cognitively unimpaired);

vi. is the dummy variable for CSF Aβ1-42 (1 = Aβ-positive, 0 = Aβ-negative);

vii. is the dummy variable for CSF p-tau181 (1 = p-tau-positive, 0 = p-tau-negative);

viii. *h(t)* represents the hazard function at time *t*;

ix. *h0t* represents the baseline hazard function.

Model 1:

Model 2:

Model 3:

Model 4:

# Diagnostic analyses

In the logistic regression analyses, we used the Hosmer-Lemeshow (HL) goodness-of-fit test (Hosmer & Lemesbow, 1980) and the link test (Pregibon, 1980) to evaluate model calibration and specification. For the HL test, observations were grouped into deciles based on predicted probabilities. A non-significant p-value (p≥0.05) indicated that the model’s predicted probabilities were well calibrated to the observed outcomes. When the HL test was significant, we explored potential model misspecification by including interaction terms among covariates, followed by a likelihood ratio test to assess model fit. If the likelihood ratio test was significant, we retained the new (full) model and reran the HL test. We used Stata’s _hatsq statistic from the link test to detect any omitted predictors. A non-significant _hatsq (p ≥ 0.05) was interpreted as evidence that the model was correctly specified.

Supplementary Table 1 shows the logistic regression diagnostics. The HL test was significant only for apathy. We addressed this by adding interaction terms among covariates, revealing a significant interaction between sex and cognitive status (OR = 3.79, 95% CI = 1.13–12.68, p = 0.03). A likelihood ratio test comparing the full model (including this interaction) with the reduced model indicated a significantly better fit for the full model (p = 0.02). We then reran the HL test on the full model (HL Chi² = 11.89, p = 0.15), which showed no evidence of mis-calibration. Therefore, we used the full model’s results as our main findings.

# Supplementary Table 1. Logistic regression diagnostics.

| Outcome | N | LR Chi² (df) | LR p-value | Pseudo R² | HL Chi² (df) | HL p-value | Link test p-value |
| --- | --- | --- | --- | --- | --- | --- | --- |
| Model 1 | | | | | | | |
| Psychosis | 1169 | 34.66 (4) | <0.0001 | 0.095 | 1.56 (8) | 0.99 | 0.74 |
| Agitation | 1168 | 80.10 (4) | <0.0001 | 0.070 | 7.03 (8) | 0.53 | 0.74 |
| Depression | 1169 | 69.87 (4) | <0.0001 | 0.058 | 12.36 (8) | 0.13 | 0.64 |
| Anxiety | 1167 | 117.63 (4) | <0.0001 | 0.112 | 1.51 (8) | 0.99 | 0.50 |
| Elation | 1168 | 17.03 (4) | 0.0019 | 0.054 | 6.30 (8) | 0.61 | 0.26 |
| Apathy | 1169 | 102.09 (4) | <0.0001 | 0.100 | 21.07 (8) | 0.007 | 0.90 |
| Disinhibition | 1169 | 62.85 (4) | <0.0001 | 0.087 | 12.67 (8) | 0.12 | 0.15 |
| Irritability | 1167 | 131.95 (4) | <0.0001 | 0.100 | 12.67 (8) | 0.12 | 0.15 |
| Motor disturbances | 1166 | 52.35 (4) | <0.0001 | 0.096 | 6.59 (8) | 0.58 | 0.55 |
| Nighttime behaviors | 1166 | 29.56 (4) | <0.0001 | 0.026 | 7.72 (8) | 0.46 | 0.13 |
| Appetite/eating | 1169 | 65.87 (4) | <0.0001 | 0.075 | 5.91 (8) | 0.65 | 0.66 |
| Model 2 | | | | | | | |
| Anxiety | 975 | 91.14 (6) | <0.0001 | 0.096 | 7.64 (8) | 0.46 | 0.11 |
| Apathy | 977 | 77.39 (6) | <0.0001 | 0.084 | 10.41 (8) | 0.23 | 0.91 |
| Motor disturbances | 975 | 37.69 (5) | <0.0001 | 0.074 | 4.66 (8) | 0.79 | 0.93 |
| Appetite/eating | 977 | 51.56 (5) | <0.0001 | 0.065 | 9.21 (8) | 0.32 | 0.57 |

Supplementary Table 1 shows the diagnostic analyses used to evaluate logistic regression model adequacy.

**N:** Number of participants.

**LR Chi² (df) and p-value:** Likelihood‐ratio chi‑square (with degrees of freedom) and overall model p‑value.

**Pseudo R²:** An index of model fit.

**HL Chi² (df) and p-value:** Hosmer–Lemeshow goodness‐of‐fit test (chi‑square with degrees of freedom and p‑value). A significant p-value suggests that the model’s predicted probabilities differ from the observed outcomes in at least one group, indicating potential mis-calibration or poor fit.

**Link test p-value:** P‑values from Stata’s link test(_hatsq), which represents the square of the model’s linear predictor. If significant, it suggests that the model may be missing key predictors.

In the Cox proportional hazards regression analyses, we used the Schoenfeld residuals test to assess the proportional hazards assumption (GRAMBSCH & THERNEAU, 1994). A non-significant p-value (p ≥ 0.05) indicated no evidence against proportional hazards. If the Schoenfeld test was significant, we stratified the model on the relevant categorical variable(s), allowing the baseline hazard to vary by stratum.

Supplementary Table 2 shows the diagnostic analyses for the Cox proportional hazards models. The Schoenfeld residuals test was significant for depression and apathy only. Consequently, we fitted a Cox model stratifying the baseline hazards by cognitive status. The Schoenfeld residuals test was then repeated (Global Chi² = 2.92, p = 0.40 for depression; Global Chi² = 0.23, p = 0.97 for apathy), indicating no further evidence against proportional hazards. Thus, we used the stratified model’s results as our main findings.

# Supplementary Table 2. Cox proportional hazards regression models diagnostics.

| Outcome | N | Observations | Failures | LR Chi² (df) | LR p-value | Global Chi² (df) | Global p-value |
| --- | --- | --- | --- | --- | --- | --- | --- |
| Model 3 | | | | | | | |
| Psychosis | 822 | 1993 | 66 | 61.50 (4) | <0.0001 | 5.06 (4) | 0.28 |
| Agitation | 689 | 1512 | 161 | 90.98 (4) | <0.0001 | 4.92 (4) | 0.29 |
| Depression | 662 | 1446 | 155 | 84.00 (4) | <0.0001 | 15.09 (4) | 0.004 |
| Anxiety | 703 | 1595 | 167 | 116.01 (4) | <0.0001 | 3.64 (4) | 0.45 |
| Elation | 824 | 1995 | 34 | 26.46 (4) | <0.0001 | 3.55 (4) | 0.47 |
| Apathy | 709 | 1593 | 152 | 108.22 (4) | <0.0001 | 17.08 (4) | 0.001 |
| Disinhibition | 771 | 1767 | 90 | 69.91 (4) | <0.0001 | 0.88 (4) | 0.92 |
| Irritability | 628 | 1326 | 185 | 91.82 (4) | <0.0001 | 2.50 (4) | 0.64 |
| Motor disturbances | 798 | 1909 | 62 | 41.88 (4) | <0.0001 | 8.32 (4) | 0.08 |
| Nighttime behaviors | 680 | 1469 | 181 | 75.67 (4) | <0.0001 | 7.87 (4) | 0.09 |
| Appetite/eating | 751 | 1680 | 159 | 65.52 (4) | <0.0001 | 4.83 (4) | 0.30 |
| Model 4 | | | | | | | |
| Psychosis | 740 | 1897 | 64 | 68.32 (6) | <0.0001 | 5.90 (6) | 0.43 |
| Anxiety | 626 | 1505 | 163 | 108.73 (6) | <0.0001 | 10.66 (6) | 0.09 |

Supplementary Table 2 shows the diagnostic analyses for Cox models.

N: Number of participants.

Observations: Total number of observations included in the model.

Failures: Number of events (failures) observed.

**LR Chi² (df) and p-value:** Likelihood‐ratio chi‑square (with degrees of freedom) and overall model p‑value.

Global Chi² (df) and p-value: The chi-square statistic (with its degrees of freedom) from the global test of the proportional‐hazards assumption using Schoenfeld residuals. A p-value ≥ 0.05 indicates no violation of proportional hazards.

# Supplementary Table 3. Prevalence of neuropsychiatric symptoms according to AD and LB pathologies.

|  | Amyloid | | p-tau | | LB | |
| --- | --- | --- | --- | --- | --- | --- |
|  | Negative | Positive | Negative | Positive | Negative | Positive |
| Psychosis | 4 (1.07%) | 38 (6.29%) | 15 (3.32%) | 27 (5.14%) | 28 (3.15%) | 14 (4.98%) |
| Agitation | 51 (13.67%) | 159 (26.37%) | 79 (17.52%) | 131 (24.95%) | 154 (17.36%) | 67 (23.84%) |
| Depression | 59 (15.82%) | 166 (27.48%) | 86 (19.03%) | 139 (26.48%) | 170 (19.14%) | 74 (26.33%) |
| Anxiety | 39 (10.48%) | 145 (24.05%) | 58 (12.86%) | 126 (24.05%) | 127 (14.33%) | 65 (23.13%) |
| Elation | 9 (2.41%) | 25 (4.15%) | 10 (2.21%) | 24 (4.58%) | 25 (2.82%) | 10 (3.56%) |
| Apathy | 43 (11.53%) | 133 (22.02%) | 73 (16.15%) | 103 (19.62%) | 119 (13.40%) | 65 (23.13%) |
| Disinhibition | 26 (6.97%) | 75 (12.42%) | 32 (7.08%) | 69 (13.14%) | 70 (7.88%) | 37 (13.17%) |
| Irritability | 76 (20.43%) | 202 (33.50%) | 110 (24.34%) | 168 (32.12%) | 210 (23.68%) | 81 (28.93%) |
| Motor disturbances | 14 (3.75%) | 56 (9.30%) | 22 (4.87%) | 48 (9.18%) | 43 (4.86%) | 29 (10.32%) |
| Nighttime behaviors | 70 (18.87%) | 132 (21.85%) | 90 (19.96%) | 112 (21.37%) | 163 (18.40%) | 56 (20.00%) |
| Appetite/eating | 32 (8.58%) | 104 (17.22%) | 54 (11.95%) | 82 (15.62%) | 93 (10.47%) | 50 (17.79%) |

Supplementary Table 3 shows the prevalence (number of cases with the corresponding percentage in parentheses) of various neuropsychiatric symptoms stratified by Alzheimer's disease and Lewy body (LB) pathologies.

# Supplementary Table 4. Cross-sectional association between LB and neuropsychiatric symptoms according to cognitive status.

|  | CU | | CI | |
| --- | --- | --- | --- | --- |
|  | OR (95% CI) | p-value | OR (95% CI) | p-value |
| Psychosis | 3.57 (0.21 to 60.56) | 0.37 | 1.19 (0.59 to 2.37) | 0.61 |
| Agitation | 1.86 (0.77 to 4.46) | 0.16 | 1.25 (0.87 to 1.80) | 0.21 |
| Depression | 1.82 (0.83 to 4.00) | 0.13 | 1.35 (0.94 to 1.93) | 0.09 |
| Anxiety | 1.04 (0.21 to 5.05) | 0.95 | 1.67 (1.16 to 2.41) | 0.005 |
| Elation | - | - | 1.21 (0.56 to 2.62) | 0.62 |
| Apathy | 2.60 (0.89 to 7.62) | 0.08 | 1.57 (1.08 to 2.28) | 0.01 |
| Disinhibition | 0.87 (0.09 to 7.74) | 0.90 | 1.56 (1.00 to 2.45) | 0.04 |
| Irritability | 1.22 (0.50 to 2.97) | 0.64 | 1.08 (0.76 to 1.52) | 0.64 |
| Motor disturbances | 7.96 (0.69 to 91.51) | 0.09 | 1.83 (1.09 to 3.07) | 0.02 |
| Nighttime behaviors | 0.93 (0.41 to 2.12) | 0.87 | 1.02 (0.69 to 1.50) | 0.90 |
| Appetite/eating | 2.78 (0.88 to 8.78) | 0.08 | 1.54 (1.02 to 2.32) | 0.03 |

Supplementary Table 4 presents the results of sensitivity analyses using a logistic regression model (model 1) investigating differences in the rate of neuropsychiatric symptoms between LB- and LB+ individuals (OR>1 indicates higher rates of neuropsychiatric symptoms in LB+ compared to LB-). Analyses were adjusted for age, sex, and cognitive status, and the sample was stratified into cognitively unimpaired (CU) and cognitively impaired (CI) groups. For each neuropsychiatric symptom, odds ratios (OR) with 95% confidence intervals (CI) and corresponding p-values are provided. Blank cells in CU analysis were due to insufficient event observations to perform statistical model.

# Supplementary Table 5. Association between LB and the development of neuropsychiatric symptoms according to cognitive status.

|  | CU | | CI | |
| --- | --- | --- | --- | --- |
|  | HR (95% CI) | p-value | HR (95% CI) | p-value |
| Psychosis | - | - | 2.31 (1.38 to 3.86) | 0.001 |
| Agitation | 1.29 (0.47 to 3.53) | 0.61 | 1.12 (0.77 to 1.63) | 0.53 |
| Depression | 1.28 (0.46 to 3.53) | 0.62) | 1.10 (0.74 to 1.62) | 0.62 |
| Anxiety | 1.41 (0.51 to 3.91) | 0.50 | 1.73 (1.22 to 2.45) | 0.002 |
| Elation | - | - | 0.72 (0.31 to 1.68) | 0.45 |
| Apathy | 2.13 (0.74 to 6.09) | 0.15 | 1.30 (0.89 to 1.89) | 0.16 |
| Disinhibition | - | - | 1.29 (0.80 to 2.10) | 0.28 |
| Irritability | 1.08 (0.47 to 2.49) | 0.84 | 1.14 (0.79 to 1.64) | 0.47 |
| Motor disturbances | 2.87 (0.46 to 17.64) | 0.25 | 1.10 (0.60 to 2.00) | 0.74 |
| Nighttime behaviors | 0.90 (0.36 to 2.19) | 0.81 | 1.34 (0.94 to 1.91) | 0.10 |
| Appetite/eating | 1.09 (0.41 to 2.89) | 0.86 | 1.18 (0.80 to 1.74) | 0.39 |

Supplementary Table 5 presents the results of longitudinal analyses using Cox proportional hazards regression (model 3) to investigate the association between Lewy body (LB) pathology and the development of neuropsychiatric symptoms. Analyses were adjusted for age, sex, and cognitive status, and the sample was stratified into cognitively unimpaired (CU) and cognitively impaired (CI) groups. For each neuropsychiatric symptom, hazard ratios (HR) with 95% confidence intervals (CI) and corresponding p-values are provided (HR > 1 indicates an increased risk of developing the symptom in LB+ compared to LB- individuals). Blank cells in CU analysis were due to insufficient event observations to perform statistical model.

# Supplementary Figure 1. Study flow chart


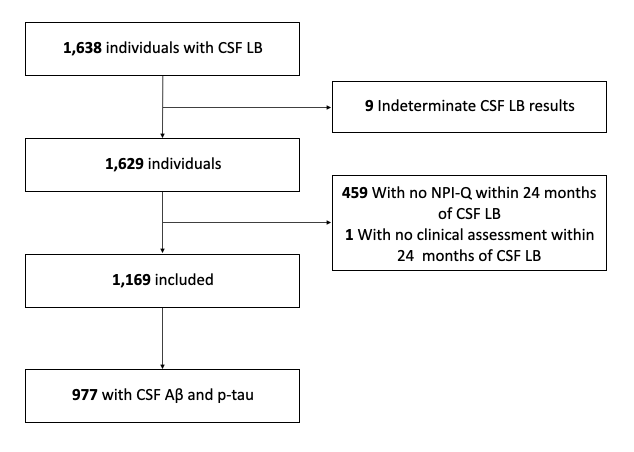


Abbreviations: CSF, cerebrospinal fluid; LB, Lewy body; NPI-Q, Neuropsychiatric Inventory Questionnaire; Aβ, amyloid-beta; p-tau, phosphorylated tau.

# References

GRAMBSCH, P. M., & THERNEAU, T. M. (1994). Proportional hazards tests and diagnostics based on weighted residuals. *Biometrika*, *81*(3), 515-526. <https://doi.org/10.1093/biomet/81.3.515>

Hosmer, D. W., & Lemesbow, S. (1980). Goodness of fit tests for the multiple logistic regression model. *Communications in Statistics - Theory and Methods*, *9*(10), 1043-1069. <https://doi.org/10.1080/03610928008827941>

Pregibon, D. (1980). Goodness of Link Tests for Generalized Linear Models. *Journal of the Royal Statistical Society. Series C (Applied Statistics)*, *29*(1), 15-14. <https://doi.org/10.2307/2346405>
